# Supplementary material for: Commensal protist Tritrichomonas musculus exhibits a dynamic life cycle that induces extensive remodeling of the gut microbiota
Source: PubMed Central journal article supplement (PMC10944700; doi:10.1093/ismejo/wrae023), 2024-02-05
Supplement: supplementary_information.pdf [file supplementary_information.pdf]

## **Supplementary Information:**

Commensal protist *Tritrichomonas musculus* exhibits a dynamic life cycle that induces extensive remodeling of the gut microbiota

The supplementary information file contains:

Supplementary Methods

Supplementary Tables 1-2

Supplementary Figures 1-8

## Supplementary Methods

### Genome sequencing and annotation

Genomic DNA was extracted from 100 million sorted protists using the MagAttract HMW DNA Kit (QIAGEN, Hilden, Germany). Sequencing libraries were prepared and sequenced using Sequel technology (PacBio, Menlo Park, CA, USA) on two SMRT cells at the McMaster University Farncombe Metagenomics Facility (Hamilton, Canada). Reads were error corrected using CANU v1.8<sup>1</sup> and assembled into contigs with Flye v.2.4.1<sup>2</sup>. The contigs were subsequently polished with eight million 300 bp paired-end reads generated on a MiSeq System (Illumina, San Diego, CA, USA), sequenced at the National Institute of Allergy and Infectious Diseases (Bethesda, Maryland), using BWA<sup>3</sup> and Pilon v.1.23<sup>4</sup>. Annotation was carried out with Maker v2.31<sup>5</sup> as follows. Repetitive regions were identified *de novo* and masked using RepeatModeler v.1.0.11<sup>6</sup> and RepeatMasker v.4.0.7<sup>7</sup>. Transfer RNA genes were predicted with tRNAscan-SE v2.0.6<sup>8</sup>. Gene models were predicted *ab initio* using two rounds of training with SNAP v.2013-11-29<sup>9</sup>, followed by Augustus v.3.3.1<sup>10</sup> with BUSCO v.2.0.1<sup>11</sup>. Reference sequences included related trichomonad *T. foetus* expressed sequence tag (EST) library (CX159216.1), *T. foetus* strain K (3AUP000179807) and *Trichomonas vaginalis* G3 (3AUP000001542) proteomes, and *Pentatrichomonas hominis* and *Dientamoeba fragilis* protein sequences available in the NCBI nr database (accessed August 21, 2019). Functional annotation was performed with InterProScan v.5.30-69.0<sup>12</sup>, the HmmerWeb v.2.41.2<sup>13</sup> hmmscan algorithm (E-value  $\leq 1e-05$ ) and Architect<sup>14</sup> (confidence  $\geq 0.5$ ). Genes encoding adhesins, meiosis, and cell cycle-related proteins were identified based on sequence homology with *T. vaginalis* proteins<sup>15,16</sup> retrieved from the TrichDB database<sup>17</sup> using BLAST<sup>18</sup> (E-value  $1e-5$ , 30% sequence identity and 40% query coverage cut-offs). The genome assembly is available at: <https://github.com/ParkinsonLab/Tritrichomonas-murine-microbiome-interactions/>.

### Phylogenetic analysis

Accessions to parabasalid ribosomal ITS sequences used in the analysis of phylogeny.

| <b>Organism</b>                       | <b>Genbank ID</b> |
|---------------------------------------|-------------------|
| <i>Monocercomonas colubrorum</i>      | AY319266          |
| <i>Trichomonas gallinae</i>           | JQ755289          |
| <i>Trichomonas tenax</i>              | HM579936          |
| <i>Trichomonas vaginalis</i>          | AY871046          |
| <i>Pentatrichomonas hominis</i>       | AY349187          |
| <i>Honigbergiella</i> sp.             | AY319274          |
| <i>Tritrichomonas musculus</i>        | KX000922          |
| <i>Tritrichomonas rainier</i>         | MH370486          |
| <i>Tritrichomonas muris</i>           | AY886843          |
| <i>Tritrichomonas foetus</i>          | KX425890          |
| <i>Tritrichomonas suis</i>            | U85967            |
| <i>Tritrichomonas</i> sp. isolate GZH | MF375342          |
| <i>Histomonas meleagridis</i>         | HM229782          |
| <i>Dientamoeba fragilis</i>           | DQ233449          |
| <i>Trichomitus</i> sp.                | KP012660          |
| <i>Trichomitus batrachorum</i>        | AY349193          |

### scRNA-Seq

Single cell profiling was carried out for protists isolated from a GF and conventionalized mouse four weeks post colonization. Protists were purified from caecal contents and immediately transferred on ice to the Princess Margaret Genomics Centre (Toronto, Canada) for STAMP library preparation using Drop-seq technology, and sequenced on a NextSeq 500 System (Illumina, San Diego, CA, USA)<sup>19</sup>. Reads were processed using Drop-seq Tools v.1.13 and aligned to the protist genome assembly using STAR v. 2.5.3a<sup>20,21</sup>. Three thousand protists per mouse (minimum 200 genes, 500 transcripts) were analyzed using Seurat v4<sup>22,23</sup>. Cells were grouped using graph-based clustering (0.8 resolution, 18 principal components) and visualized via UMAP<sup>24</sup>. Differentially expressed (DE) genes were identified using the FindAllMarkers function, and functional enrichments were determined based on overrepresentation of pathway enzymes as defined by KEGG using the hypergeometric test or GO terms using the topGO package and the Fisher's Exact test<sup>25,26</sup>. Enrichments of custom-defined gene sets (meiosis, G1/S, and G2 phase genes) were scored with the AddModuleScore function and evaluated using two-sided Wilcoxon rank-sum tests. Benjamini-Hochberg correction was applied for multiple testing<sup>27</sup>. Heatmaps were generated using pheatmap 1.0.12 and Ward.D2 clustering<sup>28</sup>.

### qPCR

DNA primers used for quantitative PCR of bacterial taxa<sup>29</sup>

| <b>Target</b>             | <b>primer sequence (5'-3')</b> |
|---------------------------|--------------------------------|
| <b>Bacterial taxa</b>     |                                |
| Firmicutes_934F           | GGAGYATGTGGTTTAATTCGAAGCA      |
| Firmicutes_1060R          | AGCTGACGACAACCATGCAC           |
| Actinobacteriota_920F     | TACGGCC GCAAGGCTA              |
| Actinobacteriota_1200R    | TCRTCCCCACCTTCCTCCG            |
| Gammaproteobacteria_1080F | TCGTCAGCTCGTGTGTGA             |
| Gammaproteobacteria_1202R | CGTAAGGGCCATGATG               |
| Bacteroidota_798F         | CRAACAGGATTAGATACCCT           |
| Bacteroidota_967R         | GGTAAGGTTTCCTCGCGTAT           |

### RNAScope

RNAScope was performed as per the RNAScope Multiplex Fluorescent Reagent Kit v2 (Advanced Cell Diagnostics, Newark, CA, USA) protocol. Approximately 0.5 cm caecum sections were excised from *Tmu*-colonized mice, placed in 10% neutral buffered formalin, and fixed overnight at room temperature (RT) with gentle agitation. The following day, samples were washed with PBS, placed in 70% ethanol, embedded in paraffin, and sliced to 7 µm sections at the Toronto Centre for Phenogenomics. Paraffin sections were baked at 40°C for 30 min in a HybEZ Oven (Advanced Cell Diagnostics, Newark, CA, USA), and treated with hydrogen peroxide at RT for 10 min. Antigen target retrieval was conducted at 99°C under the 15 min standard procedure. A barrier was created around sections using an ImmEdge pen (Vector Laboratories, Burlingame, CA, USA) and allowed to dry for 15 min. Samples were treated with protease at 40°C for 30 min and stored in saline sodium citrate solution overnight (175.3 g NaCl, 88.2 g sodium citrate, 800 mL ddH<sub>2</sub>O, pH 7). TSA Plus Fluorophores Fluorescein and Cyanine 3 were hybridized against protist probes TMU\_00005724 and TMU\_00016742 respectively, and samples were visualized using a Zeiss AXIO Observer microscope (Carl Zeiss AG, Jena, Germany).

## Transmission Electron Microscopy

Protist pellets were prepared using the standard methods for the Embed 812 resin kit (Electron Microscopy Sciences (EMS), Hatfield, PA, USA)<sup>30</sup>. Briefly, samples were fixed with 4% paraformaldehyde, 1% glutaraldehyde in phosphate buffer (PB; 0.1 M, pH 7.2) for 1 hour at room temperature and overnight at 4°C, and washed 3x with PB. They were subjected to a second fixation step with 1% OsO<sub>4</sub> in PB for 1 hour in the dark, and washed 3x with PB for 10 min at RT. Samples were dehydrated in a gradient ethanol series: 30% ethanol for 15 min, 50% ethanol for 20 min, 70% ethanol for 30 min, 90% ethanol for 45 min, and 100% ethanol for 60 min. Dehydrated samples were then infiltrated with the Embed 812 resin kit (EMS) diluted with propylene oxide: 100% propylene oxide for 20 min, 33% (v/v) Embed 812 resin mixture in propylene oxide for 2 hours, 67% (v/v) Embed 812 resin mixture in propylene oxide for 3 hours, 100% Embed 812 resin mixture overnight, and fresh 100% Embed 812 resin mixture for 2 hours. After infiltration, samples in resin were placed in molds and cured at 65°C for 48 hours.

Resin blocks were sectioned to 80 nm thickness with a Reichert Ultracut E microtome (Leica, Wetzlar, Germany), collected on 300 mesh copper grids (EMS), and counter stained for 10 min using saturated 5% uranyl acetate followed by Reynold's lead citrate (EMS). Prepared grids were placed on a filter paper mat in labelled Petri dishes and stored in a desiccator until imaging. The sections were imaged using a Talos L120C transmission electron microscope (Thermo Scientific, Waltham, MA, USA) equipped with a BM-Ceta scientific CMOS camera at an accelerating voltage of 120 KV.

## References

- 1 Koren, S. *et al.* Canu: scalable and accurate long-read assembly via adaptive k-mer weighting and repeat separation. *Genome Res* **27**, 722-736, doi:10.1101/gr.215087.116 (2017).
- 2 Kolmogorov, M., Yuan, J., Lin, Y. & Pevzner, P. A. Assembly of long, error-prone reads using repeat graphs. *Nat Biotechnol* **37**, 540-546, doi:10.1038/s41587-019-0072-8 (2019).
- 3 Li, H. Aligning sequence reads, clone sequences and assembly contigs with BWA-MEM. *arXiv:1303.3997v1* (2013).
- 4 Walker, B. J. *et al.* Pilon: an integrated tool for comprehensive microbial variant detection and genome assembly improvement. *PLoS One* **9**, e112963, doi:10.1371/journal.pone.0112963 (2014).
- 5 Cantarel, B. L. *et al.* MAKER: an easy-to-use annotation pipeline designed for emerging model organism genomes. *Genome Res* **18**, 188-196, doi:10.1101/gr.6743907 (2008).
- 6 Smit, A. & Hubley, R. *RepeatModeler Open-1.0* (2008-2015).
- 7 Smit, A., Hubley, R. & Green, P. *RepeatMasker Open-4.0.*, <<http://www.repeatmasker.org>> (2013-2015).
- 8 Chan, P. P. & Lowe, T. M. tRNAscan-SE: Searching for tRNA Genes in Genomic Sequences. *Methods Mol Biol* **1962**, 1-14, doi:10.1007/978-1-4939-9173-0\_1 (2019).
- 9 Korf, I. Gene finding in novel genomes. *BMC Bioinformatics* **5**, 59, doi:10.1186/1471-2105-5-59 (2004).
- 10 Stanke, M., Schoffmann, O., Morgenstern, B. & Waack, S. Gene prediction in eukaryotes with a generalized hidden Markov model that uses hints from external sources. *BMC Bioinformatics* **7**, 62, doi:10.1186/1471-2105-7-62 (2006).
- 11 Simao, F. A., Waterhouse, R. M., Ioannidis, P., Kriventseva, E. V. & Zdobnov, E. M. BUSCO: assessing genome assembly and annotation completeness with single-copy orthologs. *Bioinformatics* **31**, 3210-3212, doi:10.1093/bioinformatics/btv351 (2015).
- 12 Jones, P. *et al.* InterProScan 5: genome-scale protein function classification. *Bioinformatics* **30**, 1236-1240, doi:10.1093/bioinformatics/btu031 (2014).

- 13 Finn, R. D., Clements, J. & Eddy, S. R. HMMER web server: interactive sequence similarity searching. *Nucleic Acids Res* **39**, W29-37, doi:10.1093/nar/gkr367 (2011).
- 14 Nursimulu, N., Moses, A. M. & Parkinson, J. Architect: A tool for aiding the reconstruction of high-quality metabolic models through improved enzyme annotation. *PLoS Comput Biol* **18**, e1010452, doi:10.1371/journal.pcbi.1010452 (2022).
- 15 Malik, S. B., Pightling, A. W., Stefaniak, L. M., Schurko, A. M. & Logsdon, J. M., Jr. An expanded inventory of conserved meiotic genes provides evidence for sex in *Trichomonas vaginalis*. *PLoS One* **3**, e2879, doi:10.1371/journal.pone.0002879 (2007).
- 16 Garcia, A. F. & Alderete, J. Characterization of the *Trichomonas vaginalis* surface-associated AP65 and binding domain interacting with trichomonads and host cells. *BMC Microbiol* **7**, 116, doi:10.1186/1471-2180-7-116 (2007).
- 17 Aurrecochea, C. *et al.* GiardiaDB and TrichDB: integrated genomic resources for the eukaryotic protist pathogens *Giardia lamblia* and *Trichomonas vaginalis*. *Nucleic Acids Res* **37**, D526-530, doi:10.1093/nar/gkn631 (2009).
- 18 Altschul, S. F., Gish, W., Miller, W., Myers, E. W. & Lipman, D. J. Basic local alignment search tool. *J Mol Biol* **215**, 403-410, doi:10.1016/S0022-2836(05)80360-2 (1990).
- 19 Macosko, E. Z. *et al.* Highly Parallel Genome-wide Expression Profiling of Individual Cells Using Nanoliter Droplets. *Cell* **161**, 1202-1214, doi:10.1016/j.cell.2015.05.002 (2015).
- 20 Nemesh, J. & Wysocker, A. *Drop-seq tools v1.13*, <<https://github.com/broadinstitute/Drop-seq/releases>> (
- 21 Dobin, A. *et al.* STAR: ultrafast universal RNA-seq aligner. *Bioinformatics* **29**, 15-21, doi:10.1093/bioinformatics/bts635 (2013).
- 22 Butler, A., Hoffman, P., Smibert, P., Papalexi, E. & Satija, R. Integrating single-cell transcriptomic data across different conditions, technologies, and species. *Nat Biotechnol* **36**, 411-420, doi:10.1038/nbt.4096 (2018).
- 23 Hao, Y. *et al.* Integrated analysis of multimodal single-cell data. *Cell* **184**, 3573-3587 e3529, doi:10.1016/j.cell.2021.04.048 (2021).
- 24 McInnes, L., Healy, J., Saul, N. & Großberger, L. UMAP: Uniform Manifold Approximation and Projection for Dimension Reduction. *Journal of Open Source Software* **3**, 861, doi:<https://doi.org/10.21105/joss.00861> (2018).
- 25 Okuda, S. *et al.* KEGG Atlas mapping for global analysis of metabolic pathways. *Nucleic Acids Res* **36**, W423-426, doi:10.1093/nar/gkn282 (2008).
- 26 Alexa, A. & Rahnenfuhrer, J. *topGO: Enrichment Analysis for Gene Ontology. R package version 2.42.0.*, <[https://github.com/lyjin/topGO\\_pipeline](https://github.com/lyjin/topGO_pipeline)> (2020).
- 27 Benjamini, Y. & Hochberg, Y. Controlling the False Discovery Rate: A Practical and Powerful Approach to Multiple Testing. *Journal of the Royal statistical society: series B* **57**, 289-300, doi:<https://doi.org/10.1111/j.2517-6161.1995.tb02031.x> (1995).
- 28 Kolde, R. *pheatmap: Pretty Heatmaps. R package version 1.0.12.*, <<https://CRAN.R-project.org/package=pheatmap>> (2019).
- 29 Bacchetti De Gregoris, T., Aldred, N., Clare, A. S. & Burgess, J. G. Improvement of phylum- and class-specific primers for real-time PCR quantification of bacterial taxa. *J Microbiol Methods* **86**, 351-356, doi:10.1016/j.mimet.2011.06.010 (2011).
- 30 Hayat, M. A. *Principles and Techniques of Electron Microscopy.* (Hodder Arnold H& S, 1981).

## Supplementary Tables

**Supplementary Table 1.** Genome assembly characteristics.

| <b>Genome assembly</b>                          |             |
|-------------------------------------------------|-------------|
| Assembly length (bp)                            | 225,109,209 |
| Scaffolds                                       | 1,780       |
| Scaffold N <sub>50</sub> (bp)                   | 295,434     |
| G+C content (%)                                 | 28.7        |
| Portion of genome with repetitive sequences (%) | 52.1        |

  

| <b>Genes</b>                           |        |
|----------------------------------------|--------|
| Portion of genome covered by genes (%) | 22.3   |
| Genes                                  | 26,723 |
| Genes with introns                     | 10,295 |
| CDS                                    | 18,405 |
| Exons per mRNA (mean)                  | 2      |
| Mean gene length (bp)                  | 1,878  |
| Mean exon length (bp)                  | 637    |
| Mean intron length (bp)                | 803    |
| tRNA transcripts (unique)              | 848    |

**Supplementary Table 2.** *Tmu* single cell RNA sequencing statistics.

|                                                 | GF mouse               | Conventionalized mouse |
|-------------------------------------------------|------------------------|------------------------|
| Input reads                                     | 232,006,542            | 224,595,499            |
| Quality filtered reads                          | 231,917,602            | 224,510,480            |
| Average input read length                       | 59                     | 60                     |
| <b>Read mapping<sup>a</sup></b>                 |                        |                        |
| Uniquely mapped reads                           | 162,949,846 (70.3%)    | 171,330,511 (76.3%)    |
| Reads mapped to no feature                      | 65,802,686 (28.4%)     | 62,552,460 (27.9%)     |
| Reads ambiguously mapped                        | 1,330,948 (0.6%)       | 1,191,630 (0.5%)       |
| Average mapped length                           | 60.21                  | 60.58                  |
| Mismatch rate per base (%)                      | 2.7%                   | 2.5%                   |
| Reads mapped to multiple loci                   | 24,904,419 (10.7%)     | 21,968,885 (9.8%)      |
| Reads mapped to too many loci                   | 4,119,855 (1.8%)       | 4,002,291 (1.8%)       |
| Unmapped reads                                  | 44,063,337 (19.0%)     | 31,211,084 (13.9%)     |
| Too short                                       | 36,411,064 (15.7%)     | 23,887,915 (10.6%)     |
| Other                                           | 3,525,148 (1.5%)       | 3,322,755 (1.5%)       |
| Chimeric reads                                  | 0 (0%)                 | 0 (0%)                 |
| <b>DropSeq cell statistics</b>                  |                        |                        |
| Cells selected                                  | 3,000                  | 2,999 <sup>b</sup>     |
| Reads                                           | 69,299,617             | 70,897,116             |
| Reads per cell (minimum; median; maximum)       | 3,999; 18,752; 171,812 | 7; 19,958; 137,383     |
| Transcripts                                     | 95,816,212             | 107,586,421            |
| Transcripts per cell (minimum; median; maximum) | 838; 3,776; 28,849     | 768; 3,140; 20,547     |
| Transcripts mapped to rRNA genes                | 4163                   | 458                    |
| Genes (protein-coding)                          | 20,338                 | 19,436                 |
| Genes per cell (minimum; median; maximum)       | 248; 823; 3,751        | 201; 589; 1,970        |

<sup>a</sup>Read mapping percentages were calculated as a proportion of quality filtered reads.

<sup>b</sup>One cell removed due to low gene and transcript detection.







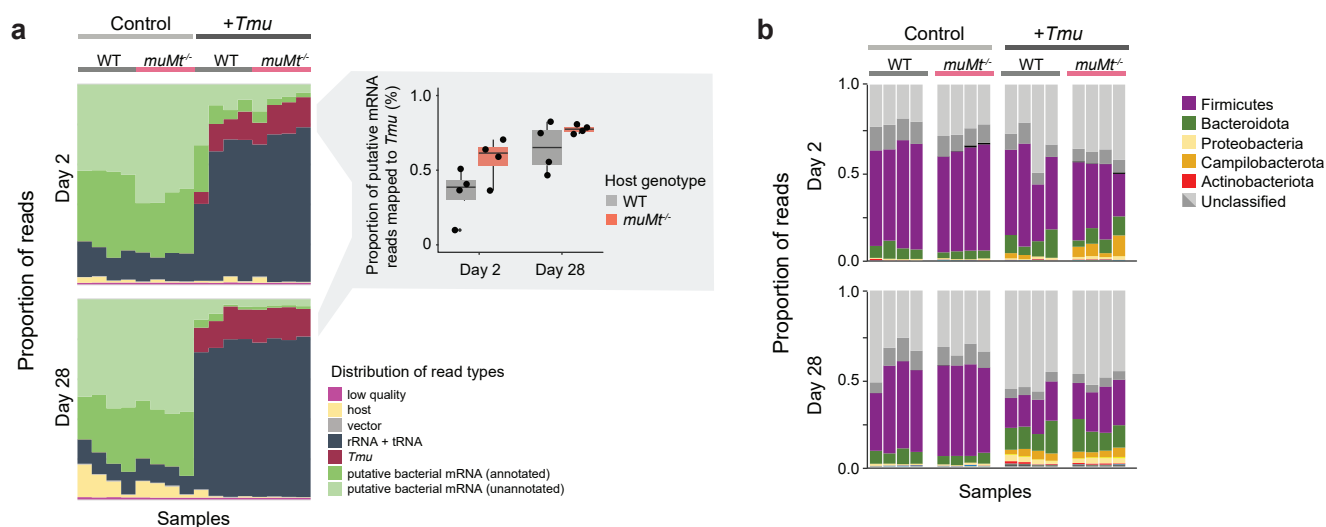

**Supplementary Figure 2.** Caecal metatranscriptomics of *Tmu*-colonized and naïve (control) WT and *muMt*<sup>-/-</sup> mice. **a**, Breakdown of caecal RNA reads from filtering and annotation steps. Columns represent samples from individual mice. Outset graph to the right shows percentages of putative mRNA reads mapped to the *Tmu* genome assembly. **b**, Taxonomic classification of putative bacterial transcripts.

Glycolysis/Gluconeogenesis, pentose phosphate and TCA

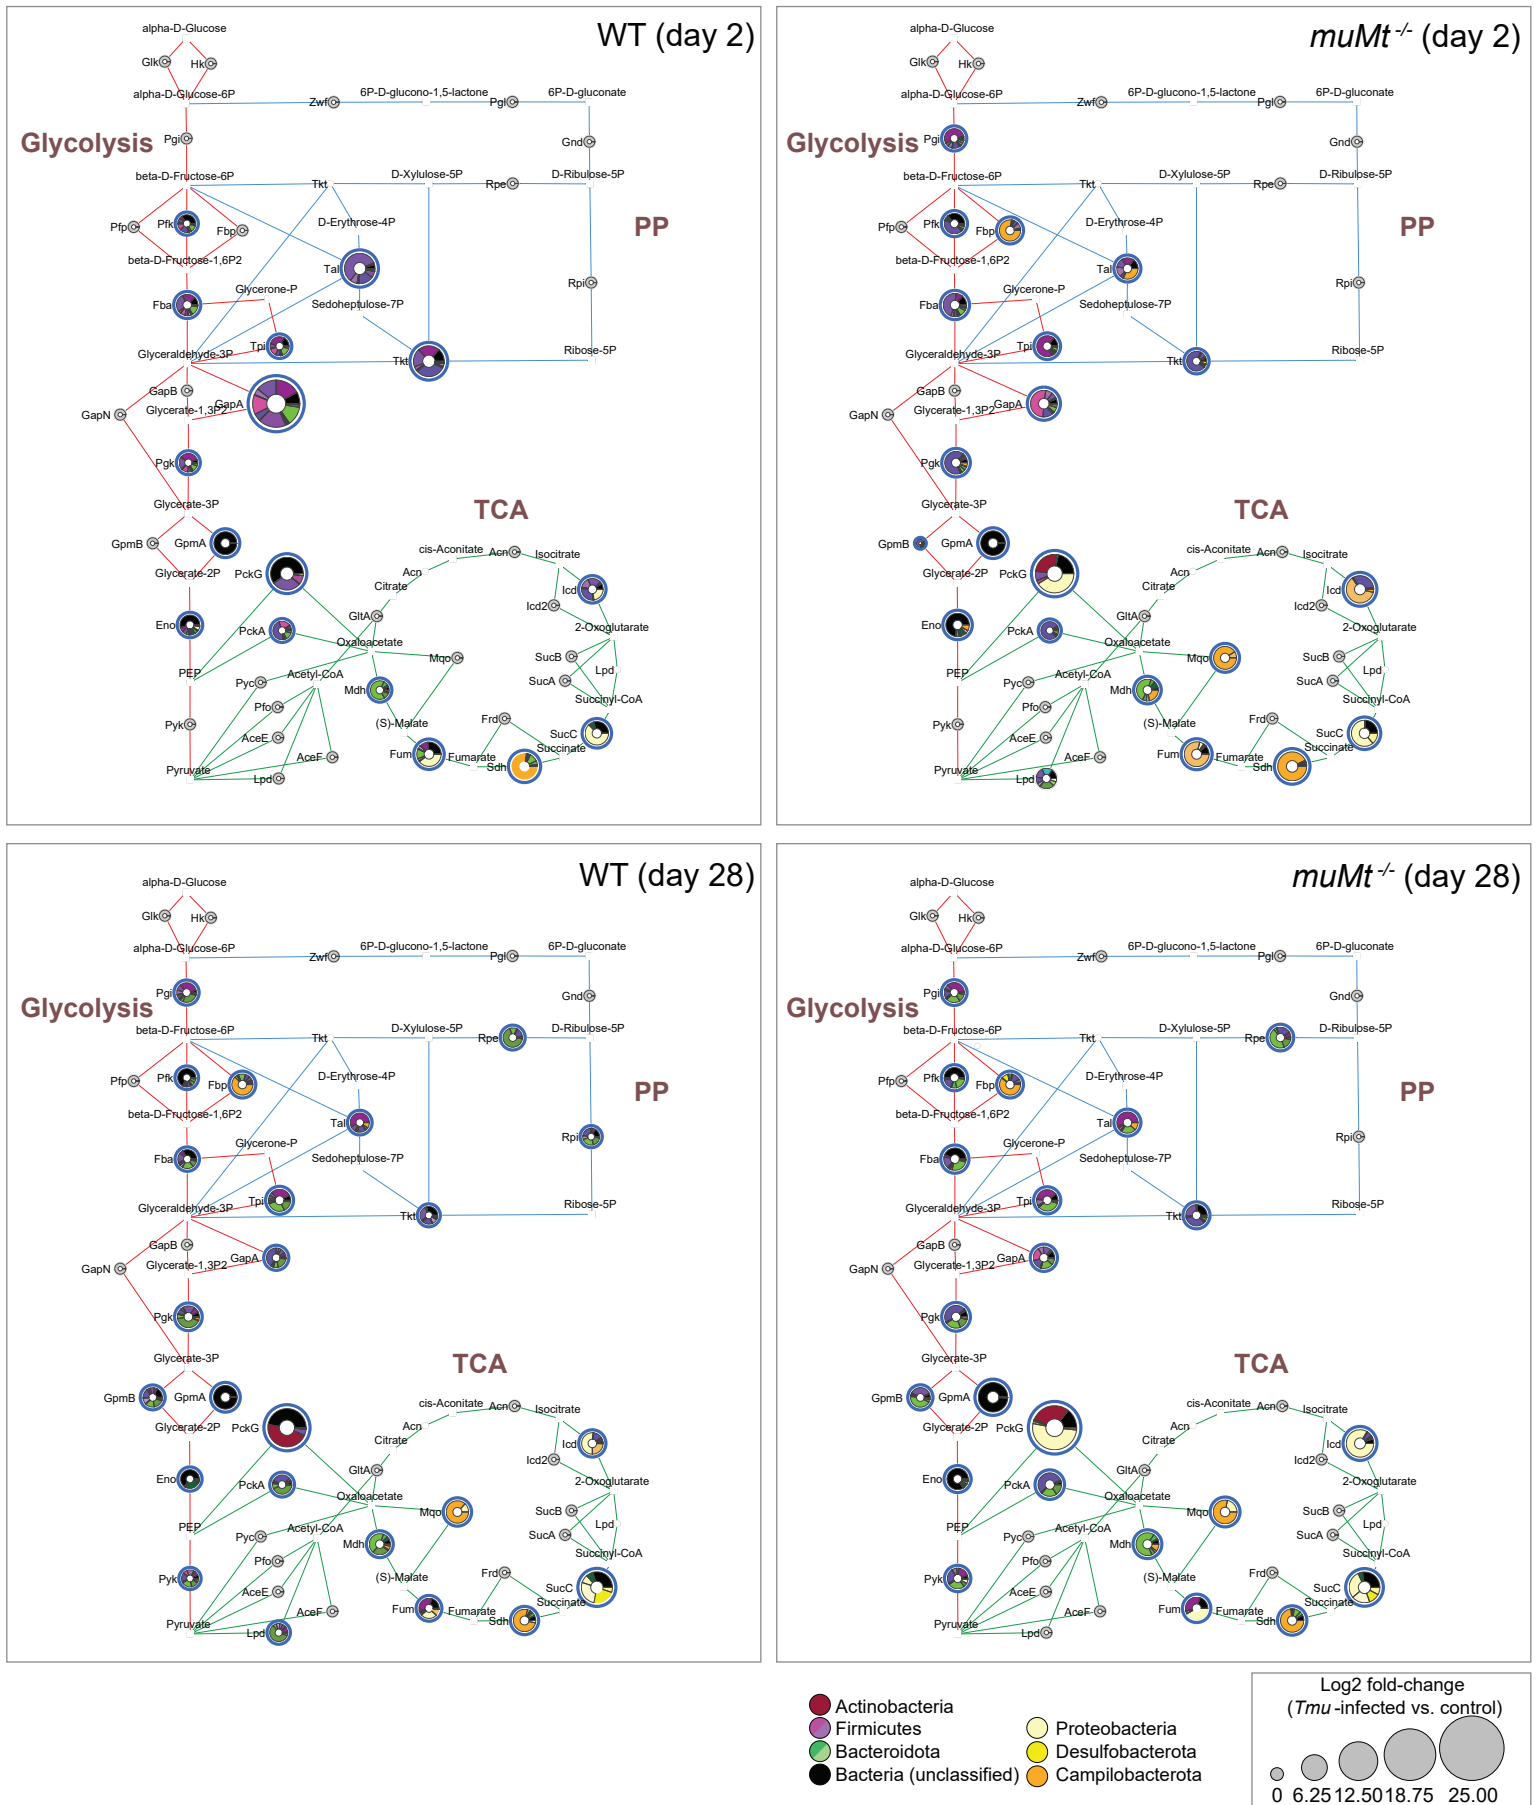

**Supplementary Figure 3.** Upregulation of bacterial metabolism in response to protist colonization. Depicted are glycolysis/gluconeogenesis (ec00010), tricarboxylic acid (TCA) cycle (ec00020) and the pentose phosphate (PP) (ec00030) pathways in gut microbiota after 2 or 28 days of infection in WT or B cell-deficient (*muMt*<sup>-/-</sup>) hosts. Genes significantly up- and downregulated ( $p < 0.05$  in DESeq2 analysis) are indicated with blue and red borders, respectively. Sizes of nodes represent log<sub>2</sub> fold-changes between *Tmu*-colonized and uninfected control mice ( $n=4$  per group). Pie charts depict the phylogenetic source of the gene expression as follows: yellows represent Proteobacteria or Desulfobacterota; orange is Campilobacterota (*Helicobacter*); shades of green are Bacteroidota (dominated by *Bacteroides* and *Parabacteroides*); pinks and purples are Firmicutes (dominated by *Lachnospiraceae* and *Clostridium*); black represents unclassified bacteria.

# Valine, leucine and isoleucine biosynthesis (ec00290)

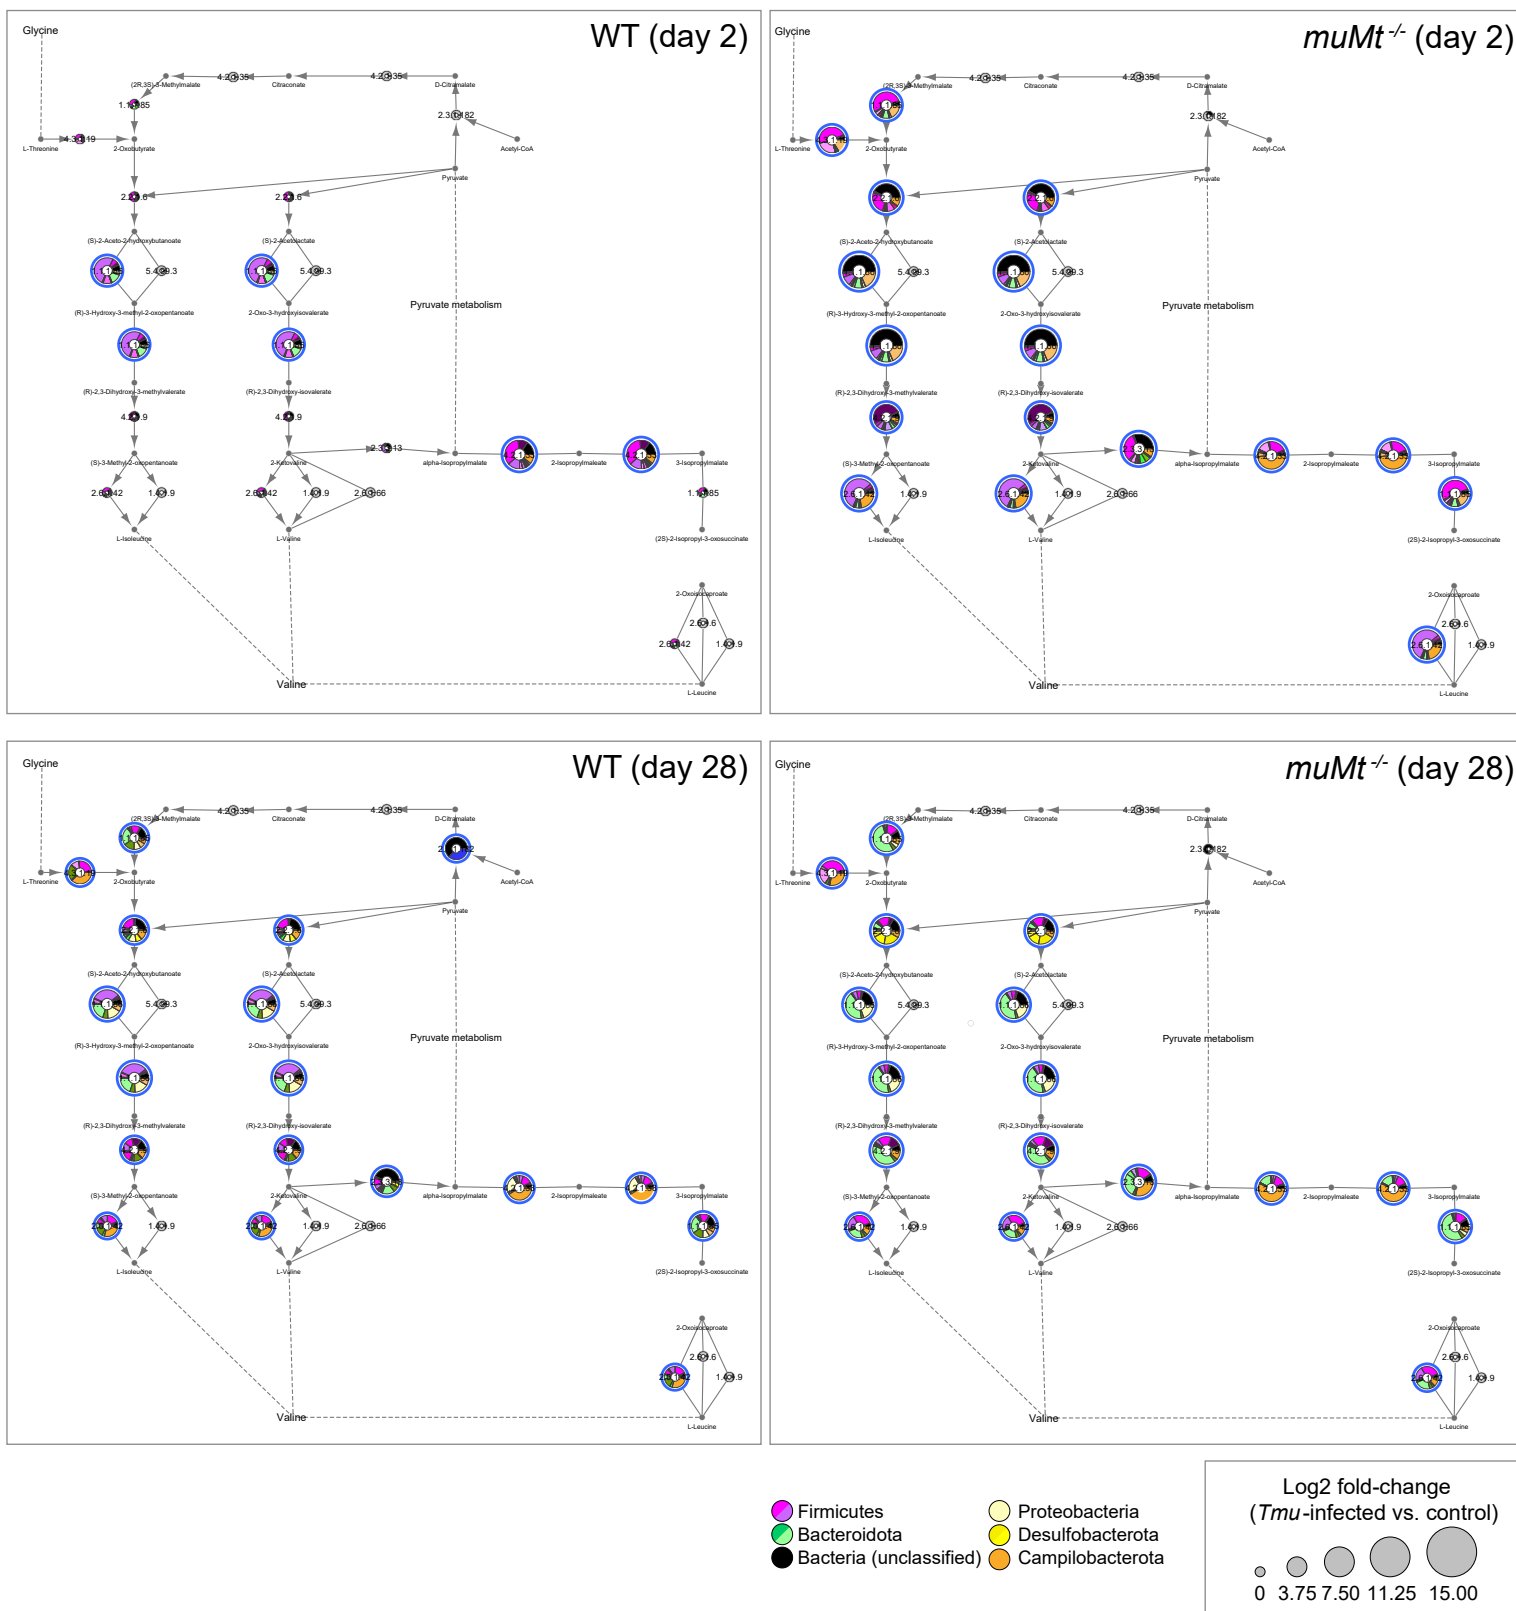

**Supplementary Figure 4.** Upregulation of Valine-Leucine-Isoleucine biosynthesis in mouse caecal microbiota in response to four weeks of protist colonization. Depicted are the KEGG-based metabolic pathways (ec00290). Genes significantly up- and downregulated ( $p < 0.05$  in DESeq2 analysis) are indicated with blue and red borders respectively. Sizes of nodes represent log<sub>2</sub> fold-changes between *Tmu*-colonized and uninfected control mice at day 28 of the experiment. Pie charts depict the phylogenetic source of the gene expression as follows: yellows represent Proteobacteria or Desulfobacterota; orange is Campilobacterota (*Helicobacter*); shades of green are Bacteroidota (dominated by *Bacteroides* and *Parabacteroides*); pinks and purples are Firmicutes (dominated by *Lachnospiraceae* and *Clostridium*); black represents unclassified bacteria.

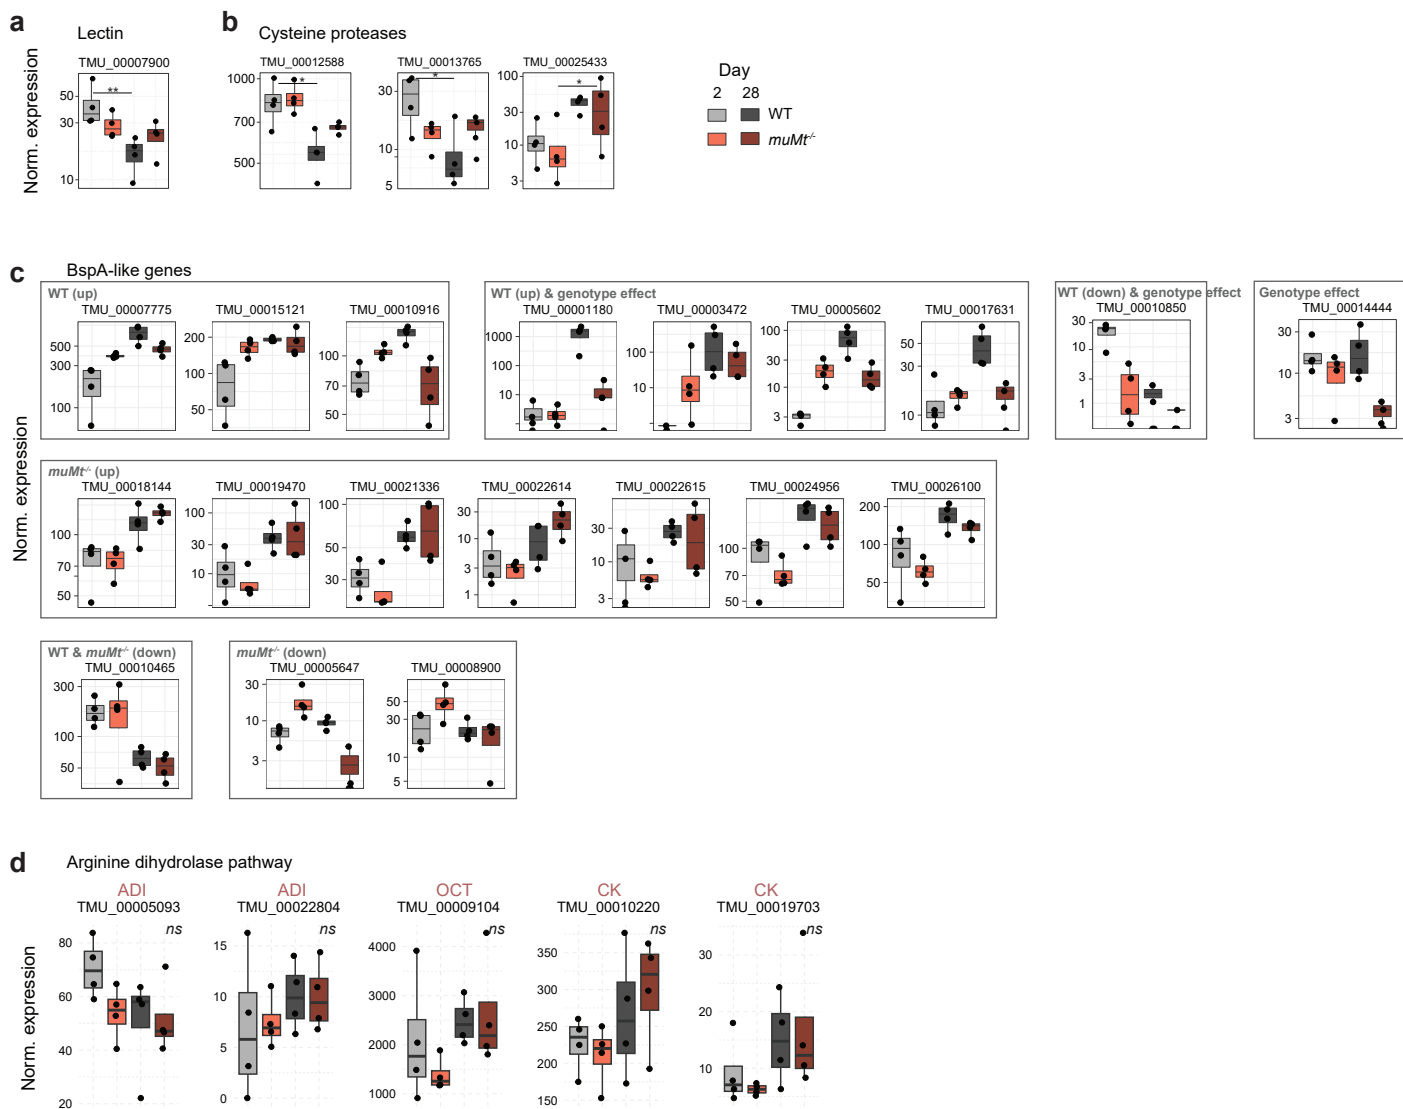

**Supplementary Figure 5.** Putative virulence-related *Tmu* genes differentially expressed over the course of colonization. **a**, Lectin and **b**, cysteine proteases differentially expressed at 28 compared to 2 days post colonization in WT or  $muMt^{-/-}$  mice as indicated. **c**, BspA-like genes with significant changes in expression over colonization time and/or which differ between host genotypes. **d**, Expression of genes with predicted activity in the arginine dihydrolase pathway: arginine deiminase (ADI), ornithine carbamoyltransferase (OCT), and carbamate kinase (CK). Differences in gene expression were tested using DESeq2. \* $p < 0.05$ , \*\*  $< 0.01$ , \*\*\*  $< 0.001$ , *ns* non-significant

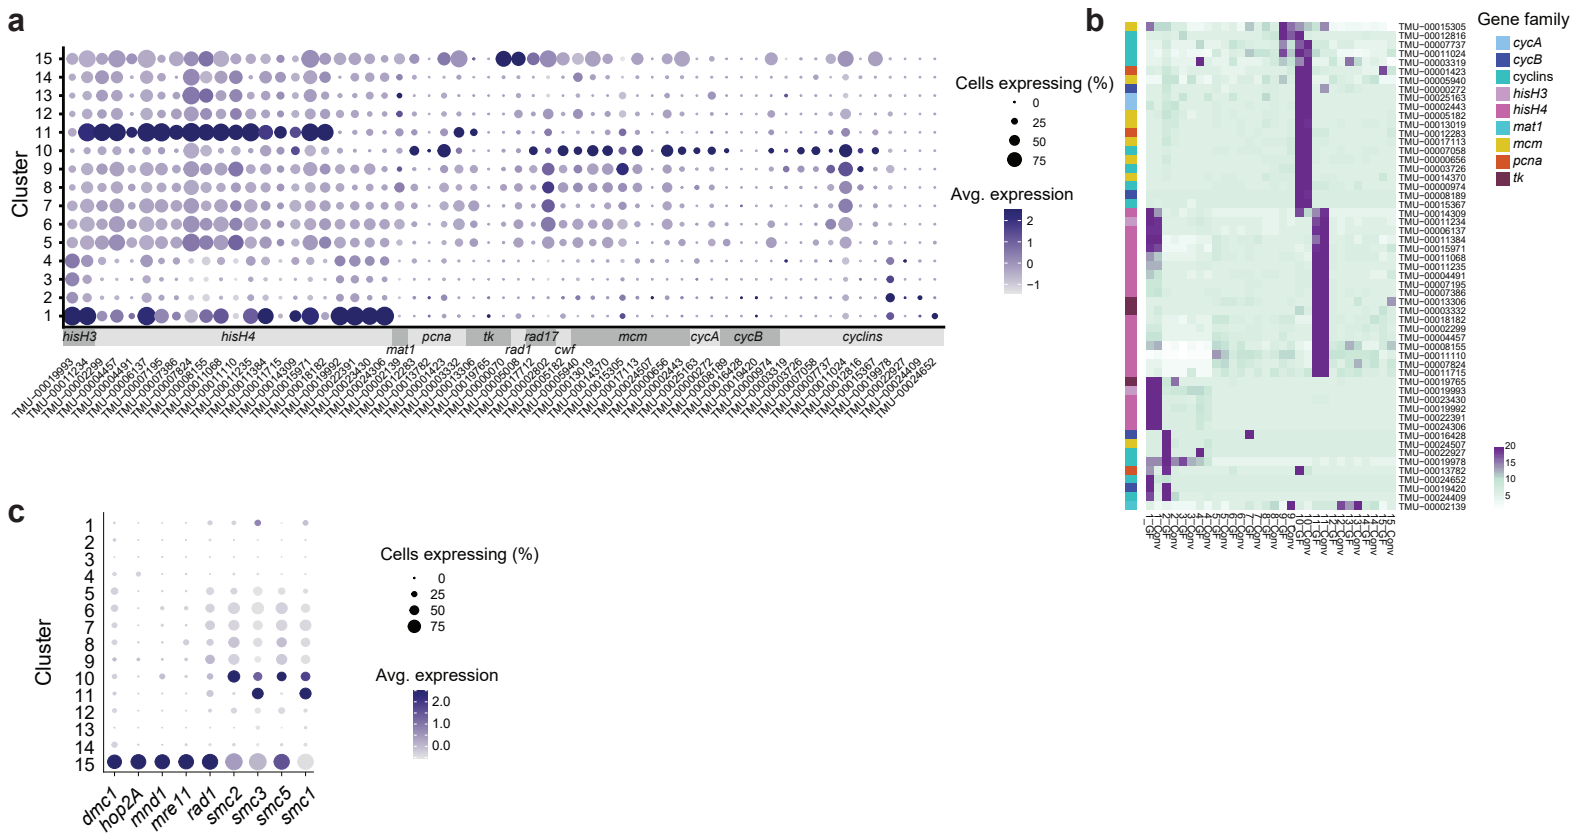

**Supplementary Figure 6.** Expression of cell cycle marker genes. **a**, Dotplot and **b**, heatmap depicting scaled read counts of genes known to be expressed during G1/S and G2 phases across each *Tmu* cluster. Colour blocks in **b** (left) indicate assigned gene function. Counts are separated by the host mouse. **c**, Expression of meiosis-specific genes.

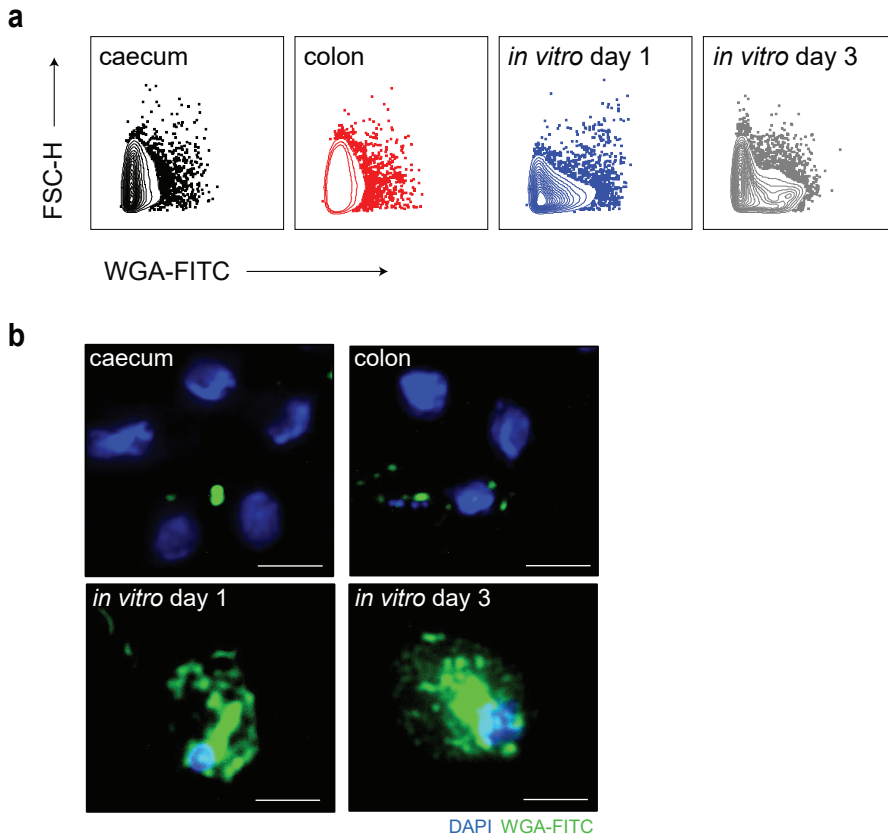

**Supplementary Figure 7.** WGA-staining of *Tmu* cells freshly isolated from mouse caeca or colons, or *in vitro* cultured for 1 to 3 days. **a**, Representative contour plots from FACS analysis of WGA-FITC stained protists. Events are gated on live single protists. n=3 animals or culture plates per group from four independent experiments. **b**, Cytopins of WGA-FITC (green) and DAPI (blue) stained protists. Representative images are shown at 63x magnification. Scale bars, 10  $\mu$ m.

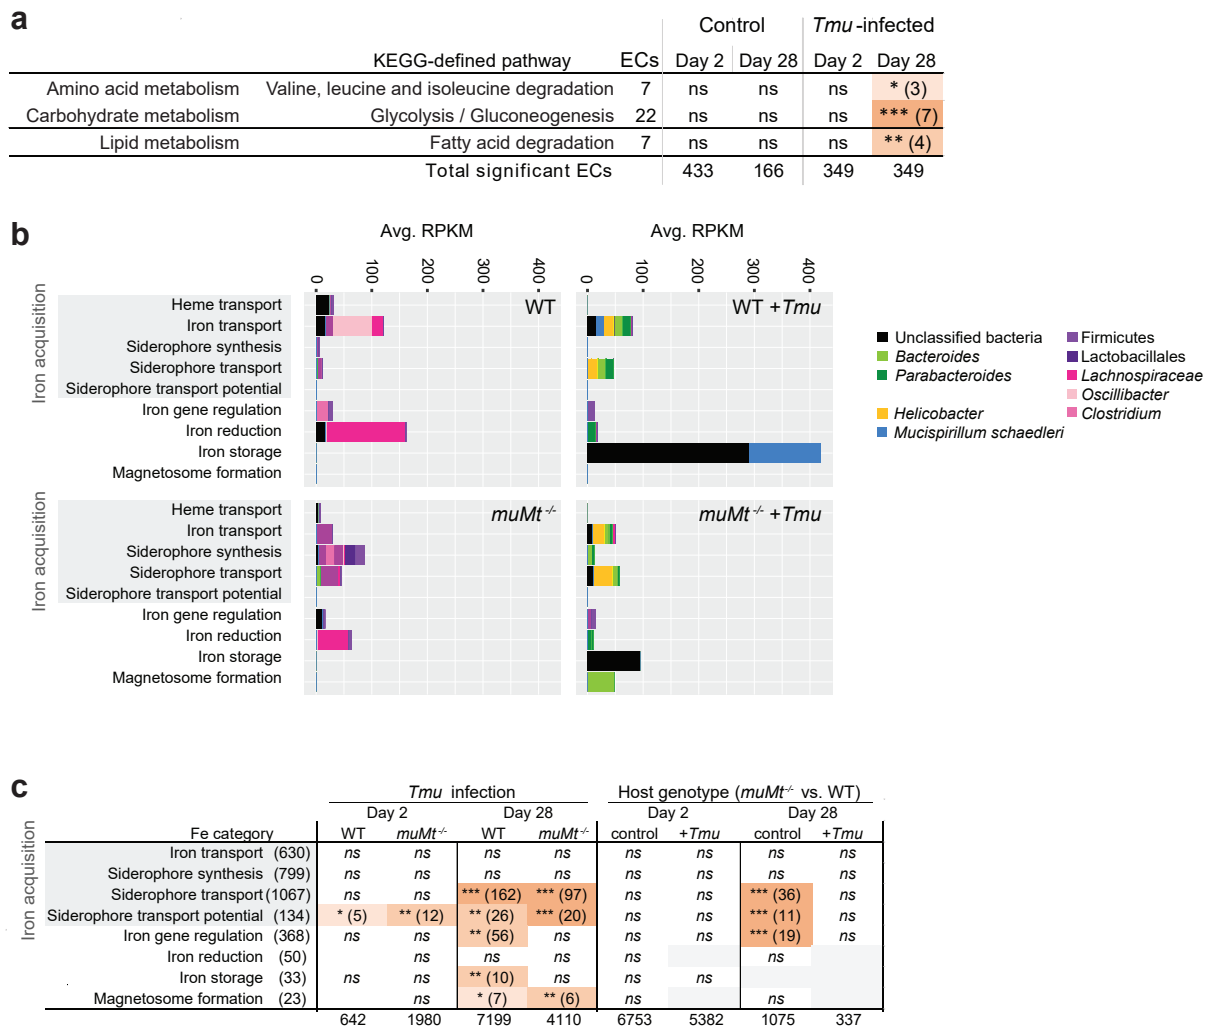

**Supplementary Figure 8.** Functional enrichment of bacterial gene expression due to protist colonization and host genotype. **a**, Metabolic pathway enrichment in caecal bacteria due to host genotype. **b**, RPKM of iron-related genes attributed to particular bacterial taxa at day 28 in WT or *muMt*<sup>-/-</sup> naïve and colonized mice. Colours represent taxa as indicated: black represents unclassified bacteria, greens are members of the Bacteroidota phylum, pinks and purples are Firmicutes, orange are Campilobacterota, blues are Deferribacterota. **c**, Enrichment of bacterial iron-related gene families due to protist colonization (*left*) and host genotype (*right*).
